# Supplementary material for: Augmenting the Clinical Data Sources for Enigmatic Diseases: A Cross-Sectional Study of Self-Tracking Data and Clinical Documentation in Endometriosis
Source: PubMed Central journal article supplement — Appl Clin Inform. 2020 Nov 18;11(5):769–84. doi: 10.1055/s-0040-1718755 (PMC7673957; doi:10.1055/s-0040-1718755), 2020-11-18
Supplement: 10-1055-s-0040-1718755-s200104ra.pdf [file 10-1055-s-0040-1718755-s200104ra.pdf]

**Supplementary Table S1** Prevalence of pain problems in the Phendo sample

| Pain problem    | Counts | Prevalence (%) <sup>a</sup> |
|-----------------|--------|-----------------------------|
| Pelvic pain     | 3,969  | 57.3                        |
| Lower back pain | 3,413  | 49.2                        |
| Ovarian pain    | 3,029  | 43.7                        |
| Epigastric pain | 2,856  | 41.2                        |
| Abdominal pain  | 2,690  | 38.8                        |
| Headache        | 2,644  | 38.1                        |
| Uterine pain    | 2,582  | 37.2                        |
| Leg pain        | 1,998  | 28.8                        |
| Vaginal pain    | 1,919  | 27.7                        |
| Hip pain        | 1,691  | 24.4                        |
| Rectal pain     | 1,526  | 22.0                        |
| Neck pain       | 1,230  | 17.7                        |
| Joint pain      | 1,146  | 16.5                        |
| Chest pain      | 1,026  | 14.8                        |
| Intestinal pain | 1,023  | 14.7                        |
| Shoulder pain   | 986    | 14.2                        |
| Dysuria         | 944    | 13.6                        |
| Cervical pain   | 901    | 13.0                        |
| Breast pain     | 722    | 10.4                        |
| Rib pain        | 706    | 10.1                        |
| Bone pain       | 570    | 8.2                         |
| Diaphragm pain  | 490    | 7.0                         |
| Arm pain        | 419    | 6.0                         |
| Dyspareunia     | 403    | 5.8                         |
| Mouth pain      | 313    | 4.5                         |

<sup>a</sup>Number of participants who tracked a question was variable, but the total sample size of 6,925 was used to compute all pain problem prevalences.

**Supplementary Table S2** Prevalence of pain problems in the Columbia University Irving Medical Center electronic health record sample (n = 4,398)

| SNOMED CT | Pain problem                | Counts | Prevalence (%) |
|-----------|-----------------------------|--------|----------------|
| 200219    | Abdominal pain <sup>a</sup> | 1,603  | 36.5           |
| 4147829   | Pain in pelvis <sup>a</sup> | 1,312  | 29.8           |
| 77670     | Chest pain <sup>b</sup>     | 405    | 9.2            |
| 77074     | Joint pain                  | 334    | 7.6            |
| 134736    | Backache                    | 299    | 6.8            |
| 4024561   | Pain in lower limb          | 261    | 5.9            |
| 378253    | Headache                    | 248    | 5.6            |
| 318736    | Migraine                    | 232    | 5.2            |
| 197684    | Dysuria                     | 191    | 4.3            |
| 4009890   | Pain in upper limb          | 149    | 3.3            |
| 442752    | Muscle pain                 | 114    | 2.6            |
| 24134     | Neck pain                   | 107    | 2.4            |
| 4170554   | Hip pain                    | 35     | 0.8            |
| 440704    | Chronic pain syndrome       | 20     | 0.4            |
| 4129418   | Bone pain                   | 16     | 0.3            |
| 438867    | Generalized aches and pains | 10     | 0.2            |
| 379031    | Pain in eye                 | 6      | 0.1            |
| 137856    | Atypical facial pain        | 4      | 0.09           |
| 4168686   | Jaw pain                    | 2      | 0.05           |

Note: Out of the total 6,925, only 5,406 participants tracked pain at least once in Phendo. Denominator of 6,925 is used to compute prevalence rates.

<sup>a</sup>588 instances counted under both categories.

<sup>b</sup>101 breast pain occurrences were found under “chest pain.”

**Supplementary Table S3** Prevalence of self-management techniques reported (%) in the Phendo sample

| Self-management technique | Count | Prevalence (%) |
|---------------------------|-------|----------------|
| Rest                      | 3,625 | 52.3           |
| Heat pack                 | 3,509 | 50.6           |
| Breathing exercises       | 2,584 | 37.3           |
| Stretching                | 2,471 | 35.6           |
| None                      | 2,047 | 29.5           |
| Massage                   | 1,364 | 19.7           |
| Medical marijuana         | 986   | 14.2           |
| Talk therapy              | 836   | 12.0           |
| Alcohol                   | 834   | 12.0           |
| Cannabidiol oil           | 822   | 11.8           |
| Ice pack                  | 480   | 6.9            |
| Tens                      | 434   | 6.2            |
| Pelvic floor therapy      | 379   | 5.4            |
| Physical therapy          | 320   | 4.6            |
| Acupuncture               | 194   | 2.8            |

Note: Out of the total 6,925, only 6,025 participants tracked at least one self-management technique in Phendo. Denominator of 6,925 is used to compute prevalence rates.

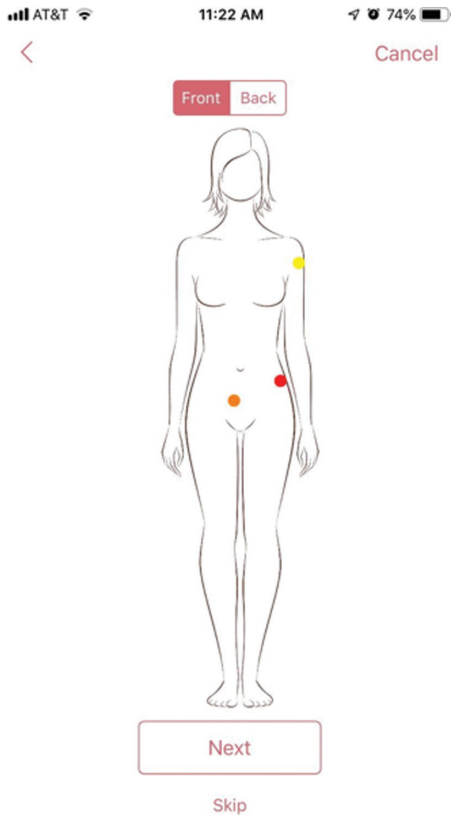

**Supplementary Figure S1** Phendo pain location and intensity response item. Mild pain in shoulder, moderate pain in ovary, and severe pain in hip are selected in the example.
